# Supplementary material for: When are two hydrogen bonds better than one? Accurate first-principles models explain the balance of hydrogen bond donors and acceptors found in proteins
Source: Royal Society of Chemistry journal article supplement (doi:10.1039/d0sc05084a), 2020-11-19
Supplement: d0sc05084a1.zip [file d0sc05084a1.zip]

## Sheet: Sheet1
N-H···O HBs
PDBID	Chain Name	Residue 1	Residue 2	d(N···O) (Å)	N-H···O (º)	EHB (kcal/mol)
3ir4	A	S169	N165	3.34	138.7	-2
5vn4	A	N213	S210	3.26	59.9	-
5fyp	D	S226	N219	3.64	158.8	-1.1
2cz2	A	N172	S15	3.59	134.4	-
3qvp	A	N398	S121	3.48	158.4	-1.7
5j1n	A	N111	S108	3.29	76.1	-2.3
3k6i	A	S56	N53	3.34	115.7	-
4l05	A	S106	N36	3.38	114.4	-0.9
4mq3	A	N176	S173	3.65	70	-0.9
4b0h	C	N69	S65	3.34	84.8	-2.3
3g1p	B	N199	S144	3.57	96.6	-
2xvm	A	S64	N41	3.59	118.8	-0.6
5itw	B	N199	S195	3.25	130	-1.9
5fyp	D	S256	N18	3.26	109.5	-1.3
3bh4	B	S477	N456	3.5	97.7	-0.7
4mzd	A	S640	N637	3.3	91	-1.1
2vov	A	N140	S88	3.22	151.8	-
1g61	A	S2152	N2109	3.19	81	-1.47
1ug6	A	N390	S386	3.13	102.7	-1.52
1w32	B	N225	S222	3.2	100.7	-2.35
2anx	B	S146	N82	3.1	82.8	-1.89
2eab	B	N750	S718	3.02	102.2	-3.9
2eiy	A	N215	S213	3.11	92.7	-1.92
2h14	A	N56	S54	2.75	96.5	-
2y7e	A	N185	S180	2.98	101.2	-2.27
2y7e	B	N185	S180	2.98	101.1	-2.63
3a07	A	N91	S62	3.02	84.5	-2.19
3a07	A	S138	N53	3	82.5	-2.54
3a07	B	N129	S100	3.08	80.8	-3
3a07	B	N91	S62	3.03	87.9	-2.56
3a07	B	S138	N53	3.04	81.1	-2.11
3b4n	A	N284	S253	3.16	99.8	-1.95
3b4n	B	N284	S253	3.2	99.4	-1.85
3ctp	A	N156	S153	3.08	103.6	-1.95
3s6e	A	N473	S429	3.08	104.7	-1.73
3sp7	A	N5	S2	3.04	90	-2.74
3vyp	A	N361	S358	3.19	97.7	-3.07
4do4	A	N293	S290	3.18	100.4	-2.34
4efp	A	N215	S213	3.12	76.3	-1.79
4n1m	A	N149	S147	3.08	95.2	-2.42
4xfk	A	N235	S233	2.98	102.7	-1.98
4esp	A	S37	Q4	3.67	73.7	-
1llf	A	Q62	S59	3.63	91	-1.2
4iau	A	Q22	S20	3.38	109.5	-0.8
2xw9	A	Q142	S140	3.6	112.4	-
1h12	A	S330	Q276	3.26	161.3	-3.1
3cwn	B	Q163	S160	3.34	146.6	-2.4
4fs7	A	Q281	S279	3.31	154.2	-2.5
4zbg	A	Q30	S28	3.23	83.5	-3.2
3g3k	A	Q207	S112	3.29	86.2	-1.3
1odz	A	S141	Q78	3.64	147.3	-0.8
4tpn	A	Q238	S101	3.54	107.3	-0.5
5u69	A	Q221	S156	3.47	92	-0.7
4yuc	A	S110	Q102	3.34	118.2	-1.1
1gwe	A	Q225	S223	3.07	103.7	-2.69
1lc5	A	Q345	S342	3.17	81.5	-1.67
1tc1	B	Q91	S89	3.04	85.1	-
2c4b	B	S113	Q15	3.11	81.7	1.8
2cws	A	S294	Q178	3.04	102	-1.77
2qxi	A	S139	Q30	2.77	100.9	-3.48
3b0t	A	Q400	S306	2.89	104.5	-
3b9w	A	S139	Q137	3.1	99.5	-1.56
3h0o	A	Q161	S37	2.68	89.4	-6.87
3m0z	A	Q94	S81	3.13	97.8	-2.03
3m0z	B	Q94	S81	3.12	97.2	-2.04
3m0z	C	Q94	S81	3.12	96.7	-2.04
3m0z	D	Q94	S81	3.14	95.2	-1.86
4beu	A	Q145	S122	3.19	91.2	-1.51
4m5e	A	Q280	S275	2.74	89.5	-3.68
4mje	A	Q70	S67	3	103.1	-1.93
5ehm	B	Q213	S116	3.18	91.7	-1.67
5akr	A	N305	T252	3.33	101	-1.1
5ta0	A	T505	N348	3.38	111.7	-1
2acf	A	T239	N236	3.6	133.8	-0.7
4bs6	A	N284	T282	3.58	132.1	-0.8
4b9f	A	T15	N10	3.23	111.4	-1.3
5btw	B	T108	N79	3.44	84.2	-0.8
2xqo	A	N148	T145	3.37	63.8	-2.1
2acf	D	T239	N236	3.63	137.1	-0.7
2nlr	A	N68	T10	3.25	148.7	-2.9
5u69	A	T179	N176	3.52	76.4	-0.7
3ast	B	T392	N356	3.5	139.9	-1.3
3ljk	A	N494	T81	3.23	126.8	-2
3gve	A	N59	T15	3.58	146.5	-1.1
5itw	A	N33	T9	3.6	163.6	-1.2
3czz	B	T97	N30	3.6	132	-0.7
1gu2	B	T66	N63	3.45	101.1	-0.8
3gve	B	N59	T15	3.61	145.7	-1
1sby	B	T115	N90	3.24	126.4	-1.8
5sxo	A	T334	N301	3.23	162.5	-3.7
4mij	A	T107	N101	3.35	169.1	-2.9
3exv	A	T214	N144	3.65	128.4	-
1c9o	A	T40	N11	2.61	102.3	-1.54
1wb4	A	N904	T902	3.07	87.6	-2.53
1wb4	B	N904	T902	3.06	86.1	-2.43
2cxv	A	N185	T2	3.01	94.2	-3.09
2cxv	A	T121	N30	3.2	90.8	-
2i5v	O	T220	N217	3.13	79.5	-1.7
2nn5	A	N109	T83	2.82	104.6	-3.42
3beu	A	N159	T137	2.78	103.2	-3.89
3beu	B	N159	T137	2.87	99.4	-3.75
3bh4	B	N456	T454	3.1	97.3	-2.48
3qzr	B	T132	N69	3.05	104.7	-2.58
4gnr	A	N127	T101	3.06	79.2	-1.96
4rlz	A	T273	N261	2.82	93.6	-3.86
4rlz	B	T273	N261	2.84	96.2	-3.38
4uzg	A	N397	T394	3.13	85.3	-
5b7h	A	N138	T135	3.13	83.3	-1.86
5i39	A	T450	N433	3.11	85.4	-1.81
5mfa	A	N638	T636	3.18	101.8	-2.28
3e2d	B	Q364	T283	3.62	104.7	-0.5
2fgq	X	T226	Q224	3.64	108.2	-0.5
5j90	A	T201	Q132	3.24	174.6	-3.7
3c6a	A	T516	Q422	3.23	151.9	-3.3
4xfk	A	Q320	T99	3.57	106.5	-0.6
3arx	A	Q240	T176	3.42	130.1	-1.1
3ls9	A	T324	Q64	3.34	104.6	-1
3ci3	A	T92	Q88	3.39	165.9	-2.4
4ouj	B	Q237	T216	3.43	153.2	-1.8
3rob	C	T91	Q20	3.49	109.3	-0.6
3e2d	B	Q364	T283	3.62	104.7	-0.5
3qzx	A	Q181	T100	3.45	165.3	-2.2
5tc6	A	Q122	T117	3.46	117.1	-0.7
2fvy	A	Q48	T8	3.15	79.2	-
3aj4	B	Q78	T65	3.16	104.1	-1.32
4b7h	A	Q235	T233	3.18	104.6	-2.61
4b7h	D	Q235	T233	3.12	104.9	-3.1
4rv5	A	Q134	T110	3.14	88	-1.57
4rv5	B	Q134	T110	3.12	88.3	-
1lq9	A	N62	Y51	3.6	94.2	-0.6
3i45	A	Y24	N12	3.47	134.1	-1.2
3fed	A	N530	Y450	3.63	96	-
4usa	A	Y766	N574	3.62	129.1	-0.7
1kb0	A	Y364	N336	3.58	119.1	-0.6
4mb4	A	N216	Y36	3.24	126.8	-1.8
3dsb	B	Y101	N36	3.47	142	-1.4
3iu1	B	N451	Y420	3.45	116.9	-
3r9f	A	Y179	N177	3.35	145.4	-2.1
1ox0	A	N262	Y260	3.3	73.6	-1.3
4wwh	A	N143	Y138	3.53	120.6	-0.7
3sd2	A	Y100	N70	3.4	149.4	-2
2gdg	A	Y99	N97	3.58	83.6	-0.7
2eab	A	Y489	N237	3.6	123.8	-
3dsb	A	Y101	N36	3.34	144.5	-2.1
1llf	A	Y522	N424	3.42	154.8	-2
1e4m	M	Y432	N410	3.08	102.1	-1.89
4bs6	B	N204	Y200	3.2	78.5	-
4x6h	A	N78	Y74	3.18	83.6	-
5emi	A	Y581	N517	3.15	84.6	-1.74
5m4l	A	Y256	N250	3	85.1	-2.23
5m4l	B	Y256	N250	2.97	86.1	-2.45
5js4	B	Q267	Y265	3.3	108.9	-
4brc	B	Q142	Y138	3.62	66	-0.6
5j90	B	Q71	Y67	3.4	93.5	-0.9
2jep	B	Q368	Y332	3.62	90	-
3feg	A	Q379	Y216	3.61	137	-0.7
4gbu	A	Q147	Y134	3.53	111.2	-0.7
3vog	A	Q241	Y237	3.64	92	-
2fb6	A	Y96	Q75	3.27	128.9	-2
4eif	A	Q80	Y76	3.66	107.5	-0.5
3jyo	A	Y72	Q12	3.27	173.2	-3.6
1goi	A	Y367	Q306	3.14	78	-1.73
1goi	B	Y367	Q306	3.02	78.8	-2.21
1i2t	A	Q1022	Y1018	3.15	93.9	-1.67
1ynp	B	Y112	Q69	2.96	95.5	-2.42
2hox	A	Q381	Y377	3.19	98	-2.03
2hox	B	Q381	Y377	3.15	87.9	-
2hyk	A	Y72	Q66	3.15	83.5	-
3lez	A	Y206	Q97	2.79	103.2	-3.11
4ayo	A	Y330	Q307	2.76	76.8	-3.6
4rj2	D	Q218	Y27	2.9	82.4	-
5itw	B	Q25	Y21	3.2	99.9	-
5js4	B	Q267	Y239	3.07	92.8	-1.94
5js4	C	Q267	Y239	3.04	92.6	-2.06
5m4l	A	Y83	Q49	3.11	82.3	-1.88
5m4l	B	Y83	Q49	3.17	79.6	-1.66
5o0s	A	Q639	Y635	3.11	84.9	-
O-H···O HBs
PDBID	Chain Name	Residue 1	Residue 2	d(O···O) (Å)	O-H···O (º)	EHB (kcal/mol)
5f8s	B	N115	S113	3.48	118.1	-
3gzb	E	S48	N45	3.56	157.8	-1.1
5j0f	A	N90	S27	3.64	173.8	-1
3aj6	B	N134	S132	3.27	113.4	-
5ibq	A	S97	N91	3.54	145.5	-1
4w8b	A	S346	N343	3.42	147.8	-1.5
2wsb	A	S124	N91	3.11	111.6	-1.5
4bpz	A	N253	S248	3.33	83.8	-0.7
2w20	B	N645	S604	3.43	130.7	-
4e3y	B	N2177	S2140	3.47	136.6	-
5vg0	A	N166	S40	3.38	151.3	-1.6
2c5a	B	N307	S244	3.41	131.9	-1.1
2qf4	B	N162	S137	3.24	168.6	-2.8
2w20	B	S601	N593	3.6	114.6	-
5ibq	A	S97	N91	3.54	145.5	-1
3r6d	A	N60	S57	3.24	164.7	-3
5vg0	B	N166	S40	3.42	151.6	-1.4
4bj0	A	N66	S35	3.62	93.6	-
5m4l	B	S154	N151	3.28	157.6	-2.8
4bj0	A	N70	S35	2.96	98	-1.88
4qqs	A	N46	S44	3.05	99.8	-1.62
4qqs	B	N46	S44	3.07	99.4	-1.54
3b7e	B	Q226	S181	3.15	159.3	-3.4
2x9g	D	Q236	S233	3.51	155.4	-1.5
2jae	A	S123	Q117	3.49	118.6	-0.6
4udx	X	S337	Q335	3.57	136.5	-0.7
2uvo	B	Q122	S91	3.5	126.3	-0.8
3wp4	A	S44	Q12	3.3	127.8	-1.3
2j23	B	Q10	S6	3.27	160	-2.5
2xfr	A	Q150	S147	3.47	158.6	-1.7
3a6r	B	S34	Q13	3.51	119.7	-0.7
4mby	C	Q188	S169	3.35	153.4	-1.9
2yln	A	S232	Q115	3.56	161.8	-1.1
2q20	A	Q79	S77	3.41	167.2	-1.7
4b9g	A	S126	Q78	3.47	103.2	-
2x9g	A	Q236	S233	3.51	155.2	-1.5
4zgw	A	S242	Q187	3.15	118.6	-1.6
1llf	B	S1436	Q1338	3.29	130.5	-1.6
1wc2	A	Q115	S53	3.48	75.3	-
5lkk	A	Q361	S359	3.01	104.2	-1.84
5lkk	B	Q361	S359	3.07	105.3	-1.67
2imi	B	T54	N50	3.1	150.1	-3.4
2r01	A	T37	N34	3.52	161.9	-1.3
2nyb	D	T143	N72	3.43	138	-1.1
5jbx	C	N103	T53	3.4	136.9	-1.2
4uyt	A	T124	N87	3.23	111.9	-1.1
3fwk	A	T262	N259	3.24	169.6	-3
4cd5	A	T345	N341	3.47	134.2	-1
2qik	A	T88	N28	3.58	136.8	-0.8
1vef	A	T204	N173	3.63	163.8	-0.9
3fpc	B	N127	T87	3.12	142.8	-3
5ehm	A	N238	T108	3.19	172	-3.8
2imq	X	T181	N179	3.56	97.3	-
5cph	B	T194	N191	3.35	161.2	-2.2
3b9w	A	T133	N128	3.28	139.7	-2.1
2acf	B	T239	N236	3.58	83.6	-0.8
3fo3	B	N226	T189	3.61	151	-0.8
1zgo	A	T209	N205	3.49	120.2	-
2dkj	B	N311	T309	2.92	107.3	-2.18
2zux	A	T537	N532	2.98	109.4	-2.42
5js4	A	N395	T393	3	107.7	-1.93
5ihv	A	Q98	T95	3.47	142.7	-
5a71	A	Q46	T43	3.4	162.5	-2
3eye	A	Q90	T88	3.44	104	-
3vup	A	Q306	T303	3.44	165.4	-1.9
1h4g	B	Q61	T59	3.52	110	-
2y8e	B	Q134	T97	3.26	172.1	-3
5a71	A	Q270	T267	3.29	173.3	-3
4b7h	B	Q456	T297	3.3	138.2	-1.8
4wwh	B	Q212	T209	3.45	151.1	-1.6
4mkn	A	Q133	T130	3.35	164.1	-2.5
1llf	B	T1293	Q1063	3.42	150.2	-1.3
1m15	A	Q337	T334	3.45	167.3	-1.9
3itf	A	Q128	T125	3.21	168.6	-3.7
5m4l	A	Q302	T299	3.55	156.4	-2.3
1wb4	B	Q939	T937	3.54	110.8	-
4b7h	C	Q235	T233	3.19	143.4	-2.5
5tif	A	Q49	T46	3.37	165.4	-2.4
2pq3	A	Q8	T5	3.49	169.2	-1.7
1m15	A	Q144	T141	3.54	170.3	-1.6
3f5l	B	Q299	T296	3.46	161.2	-1.8
2z8x	A	Q96	T93	3.38	171.2	-2.5
2vzc	A	Q289	T284	3.55	128.8	-
2uxw	A	Q197	T194	3.54	159.1	-1.4
5toq	B	Q204	T201	3.47	152.5	-1.6
2bln	B	T286	Q280	3.6	113.9	-0.3
3a72	A	Y241	N180	3.32	95.6	-0.8
1u3w	A	N114	Y110	3.36	155.2	-2
2hox	A	N386	Y377	3.59	158.7	-0.8
3b79	A	Y118	N55	3.44	145.6	-1.4
2osx	A	Y409	N90	3.38	152.7	-1.8
2vfr	A	Y208	N127	3.27	130	-1.6
3arx	A	N581	Y153	3.63	151.9	-
4hde	A	Y183	N79	3.19	98.8	-
4wwh	A	N180	Y138	3.03	105.8	-1.69
4wwh	B	N180	Y138	2.99	109.9	-
5epu	E	Y52	Q31	3.56	98	-
4gwb	A	Q101	Y63	3.6	113.6	-
3arx	A	Y430	Q417	3.6	109.2	-0.4
2hw2	A	Y100	Q52	3.36	157.8	-1.8
Ambifunctional HBs
PDBID	Chain Name	Residue 1	Residue 2	d(O···O) (Å)	O-H···O (º)	d(N···O) (Å)	N-H···O (º)	EHB O-H···O (kcal/mol)	EHB N-H···O (kcal/mol)
1ix9	B	N111	S108	3.41	109.8	3.66	68.7	-	-1.4
2cs7	C	S14	N12	3.55	123.4	3.22	115.2	-1.7	-2.9
5f8s	B	N118	S34	3.32	124.8	3.23	146.4	-1.4	-2.8
4ivv	A	S33	N30	3.45	104.3	3.48	73.7	-	-
3tys	A	N6	S4	3.47	111.9	3.3	70.5	-	-
3kwr	B	Q39	S37	3.59	103.2	3.63	77.4	-	-
3ir4	A	S114	Q32	3.14	134.6	3.34	130.4	-2.7	-1.5
4awt	A	T243	N189	3.46	148.6	3.39	93.8	-	-
3db7	A	T130	N128	3.24	124.9	3.33	126.8	-1.7	-1.5
2y5p	D	T374	N371	3.54	47.8	3.56	75.6	-	-
4usa	A	T688	N685	3.36	174.1	3.57	65.8	-2.5	-
1gqv	A	N50	T47	3.23	110.6	3.39	59	-1.5	-0.3
2i5v	O	T253	N251	3.22	116.7	3.41	85.4	-1.5	-1.5
4b7h	C	T414	N412	3.13	135.2	3.63	94.7	-2.8	-
5w8o	B	Q190	T187	3.5	160.6	3.35	77.7	-	-
3r3s	D	T31	Q19	3.6	146.2	3.39	114.3	-	-4
3kfa	B	T389	Q252	3.33	146.6	3.47	146.6	-2	-1.7
2p2s	A	Q104	T100	3.45	129.1	3.66	137.5	-	-0.6
1h1n	A	T187	Q147	3.35	152.9	3.22	103.2	-2.1	-1.3
4efp	B	N56	Y23	3.35	81.4	3.37	74.6	-	-
1y9z	A	Y57	N55	3.41	126.1	3.62	85.4	-1	-
4z27	B	Y69	Q40	3.62	117.7	3.58	92.7	-	-
